# Supplementary material
Source: PubMed Central journal article supplement (PMC6902197)
Supplement: jamainternmed-180-215-s001.pdf [file jamainternmed-180-215-s001.pdf]

## Supplementary Online Content

Goodwin JS, Li S, Kuo Y-F. Association of the work schedules of hospitalists with patient outcomes of hospitalization. *JAMA Intern Med*. Published online November 25, 2019. doi:10.1001/jamainternmed.2019.5193

**eAppendix.** Expressing schedule continuity by the median number of consecutive days worked in a year.

**eFigure 1.** Cohort selection for identifying hospitalists (steps 1-4) and hospitalist schedules (steps 4-7).

**eFigure 2.** Cohort selection for identifying outcomes of hospitalist care.

**eFigure 3.** This figure presents an analysis of 10 randomly selected hospitalists in 2016, examining the distribution of their blocks of working days.

**eFigure 4.** Distribution of consecutive days worked for all hospitalists in 2016.

**eFigure 5.** Distribution of skewness in hospitalist schedules.<sup>1</sup>

**eFigure 6.** The effect of varying the method of estimating continuity of hospitalist schedule on the association between hospitalist schedule and 30-day mortality.

**eFigure 7.** Penalized B-splines smoothing curve and 95% confidence band for weighted average of median working days and 30 day mortality.<sup>2,3</sup>

**eTable 1.** Odds of 30-day mortality for medical admissions aged 66+ and without an Intensive Care Unit (ICU) stay during hospitalization, by patient characteristics, from a conditional logistic model for 01/01/2014 - 11/30/2016, 100% TX Medicare data.

**eTable 2.** Intraclass correlation coefficients (ICCs) from multilevel model predicting whether an admission received care from hospitalists who were in the highest quartile in mean weighted schedule continuity.

**eTable 3.** Association of each 10% increase in weighted mean hospital schedule continuity with 30-day mortality, readmission, and rate of discharge home.

**eTable 4.** Association of continuity of hospitalist schedule, by quartile, with unadjusted and adjusted 30-day mortality, readmission and rate of discharge home.

**eTable 5.** Correlation among 3098 hospitalists in their ranking of continuity of their schedules, with continuity of their schedules calculated as the percent of working days that were part of a 3, 4, 5, 6 or 7 day block of continuous working days.

**eTable 6.** Association of continuity of the schedules of the treating hospitalists, by quartile, with unadjusted and adjusted 30-day mortality, 30-day readmission and rate of discharge home.

**eReferences.**

This supplementary material has been provided by the authors to give readers additional information about their work.

**eAppendix.** Expressing schedule continuity by the median number of consecutive days worked in a year.

In exploratory analyses, we found that the distribution of the number of consecutive days worked in a year for each hospitalist was highly skewed (Appendix e-Figures 3-5). We took two approaches to deal with this. The first is the approach described in the main analyses, which was to count all the working days in a year for each hospitalist and calculate the percent of those working days that were part of a 7-day or longer block of consecutive working days. The second method was to calculate the median number of days that were part of blocks of consecutive days during the year, for each hospitalist. For each hospitalist, we grouped each block of consecutive days worked. Appendix e-Figure 3 shows an example for 10 randomly selected hospitalists. We then calculated for each hospitalist the median number of consecutive days worked in that year. For each admission, we calculated the mean of the median of consecutive days for all the treating hospitalists, weighted by the number of days they provided care for that admission (assessed by E&M charge). We then ranked all admissions by the weighted mean of the median days consecutively worked by the treating hospitalists, and expressed that as quartile of hospitalist continuity, similar to the main analyses. The outcomes of these analyses are shown in Appendix e-Table 6 and e-Figure 7.

**eFigure 1.** Cohort selection for identifying hospitalists (steps 1-4) and hospitalist schedules (steps 4-7). Abbreviations: E&M, evaluation and management; ICU: intensive care unit.

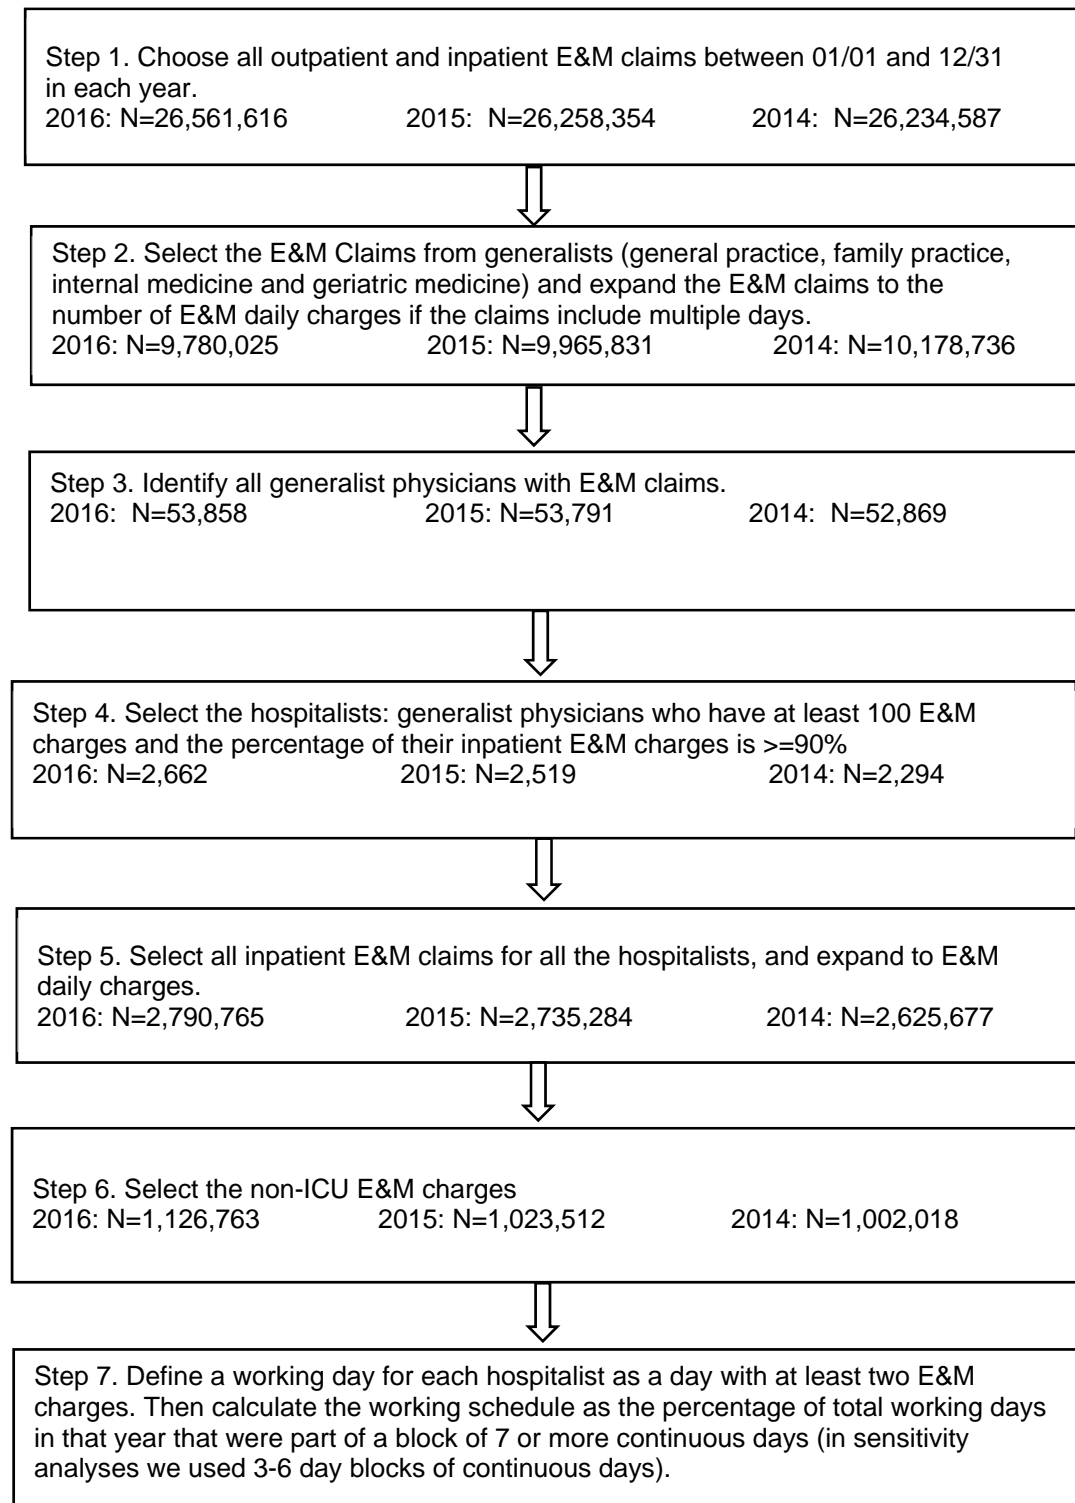

**eFigure 2.** Cohort selection for identifying outcomes of hospitalist care. Abbreviations: ICU: intensive care unit; HMO, health maintenance organization; DRG, diagnosis-related group E&M, evaluation and management.

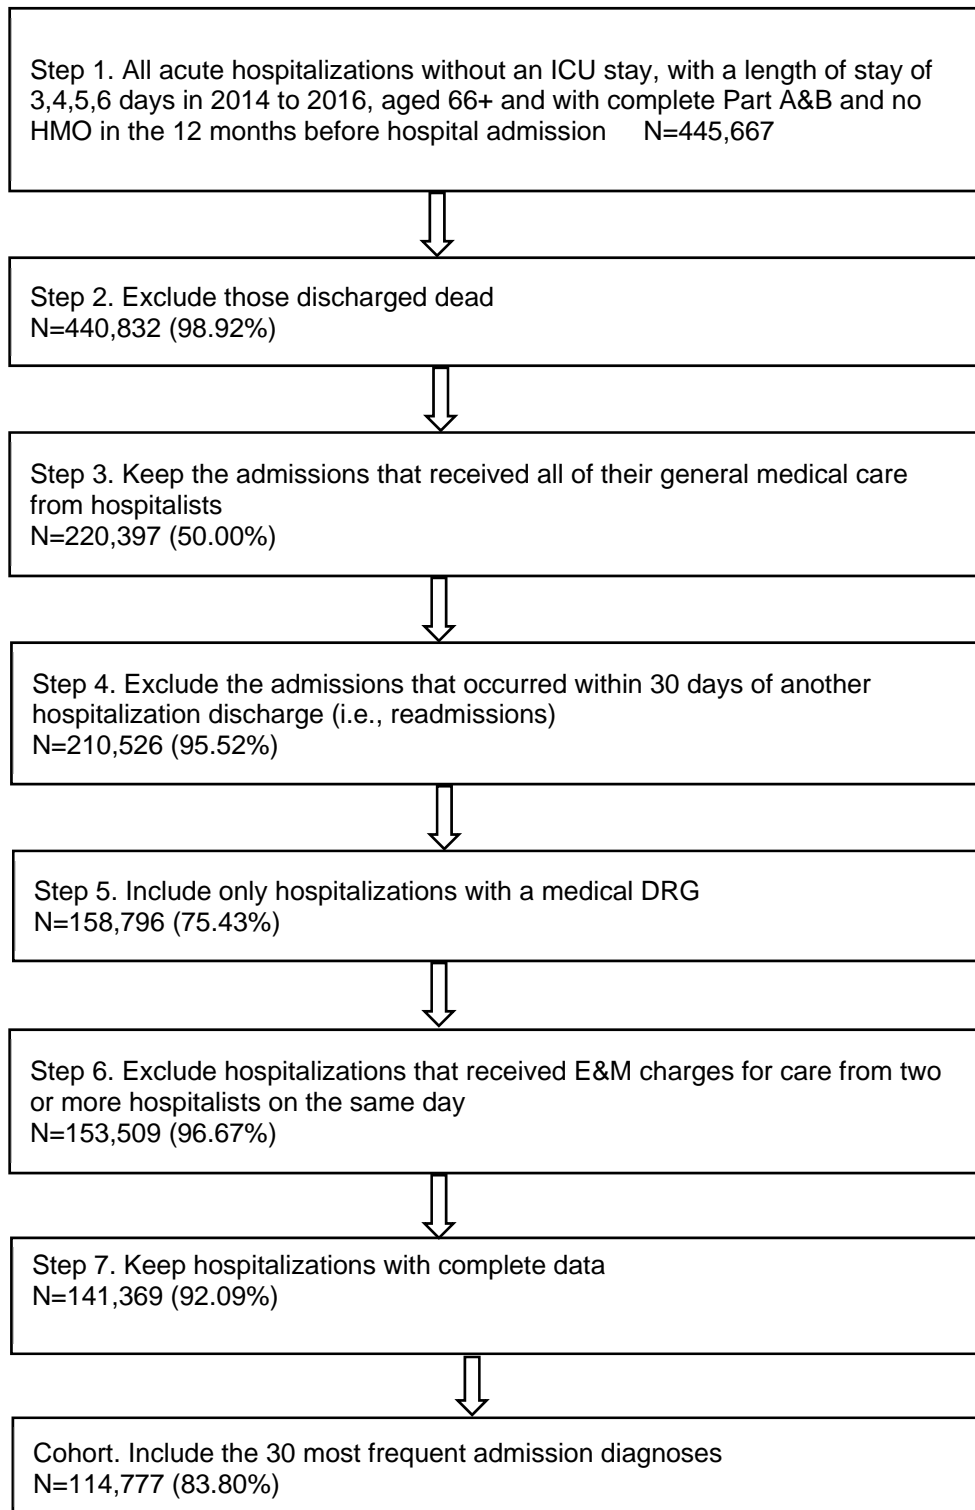

**eFigure 3.** This figure presents an analysis of 10 randomly selected hospitalists in 2016, examining the distribution of their blocks of working days. For example, with hospitalist #5, most of the blocks were of 1, 2, or 3 consecutive working days, but approximately 12% were 5 day blocks and 5% were blocks of 10 or more consecutive days. All 10 hospitalists had some blocks of just one consecutive working day although, for most of the hospitalists, that represented a low percent of their total working days, as shown in Appendix e-Figure 4.

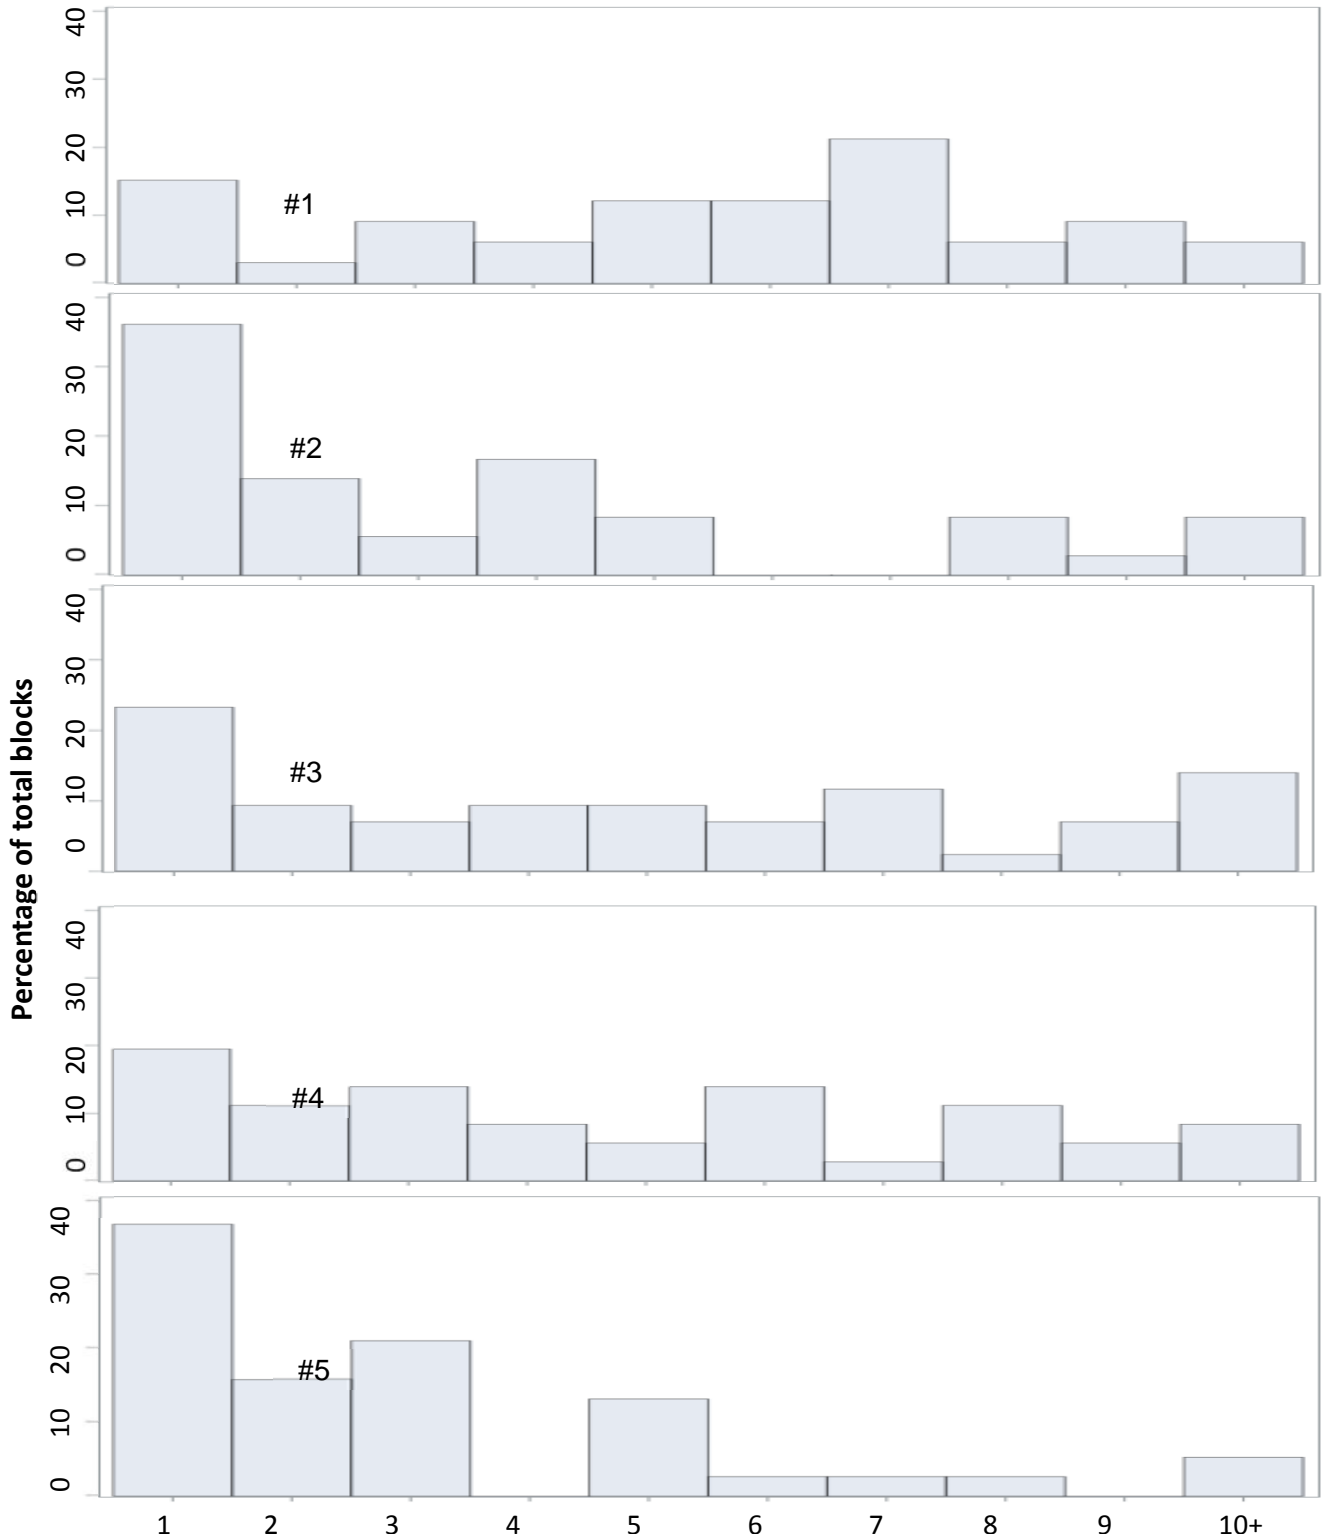

eFigure 3 continued.

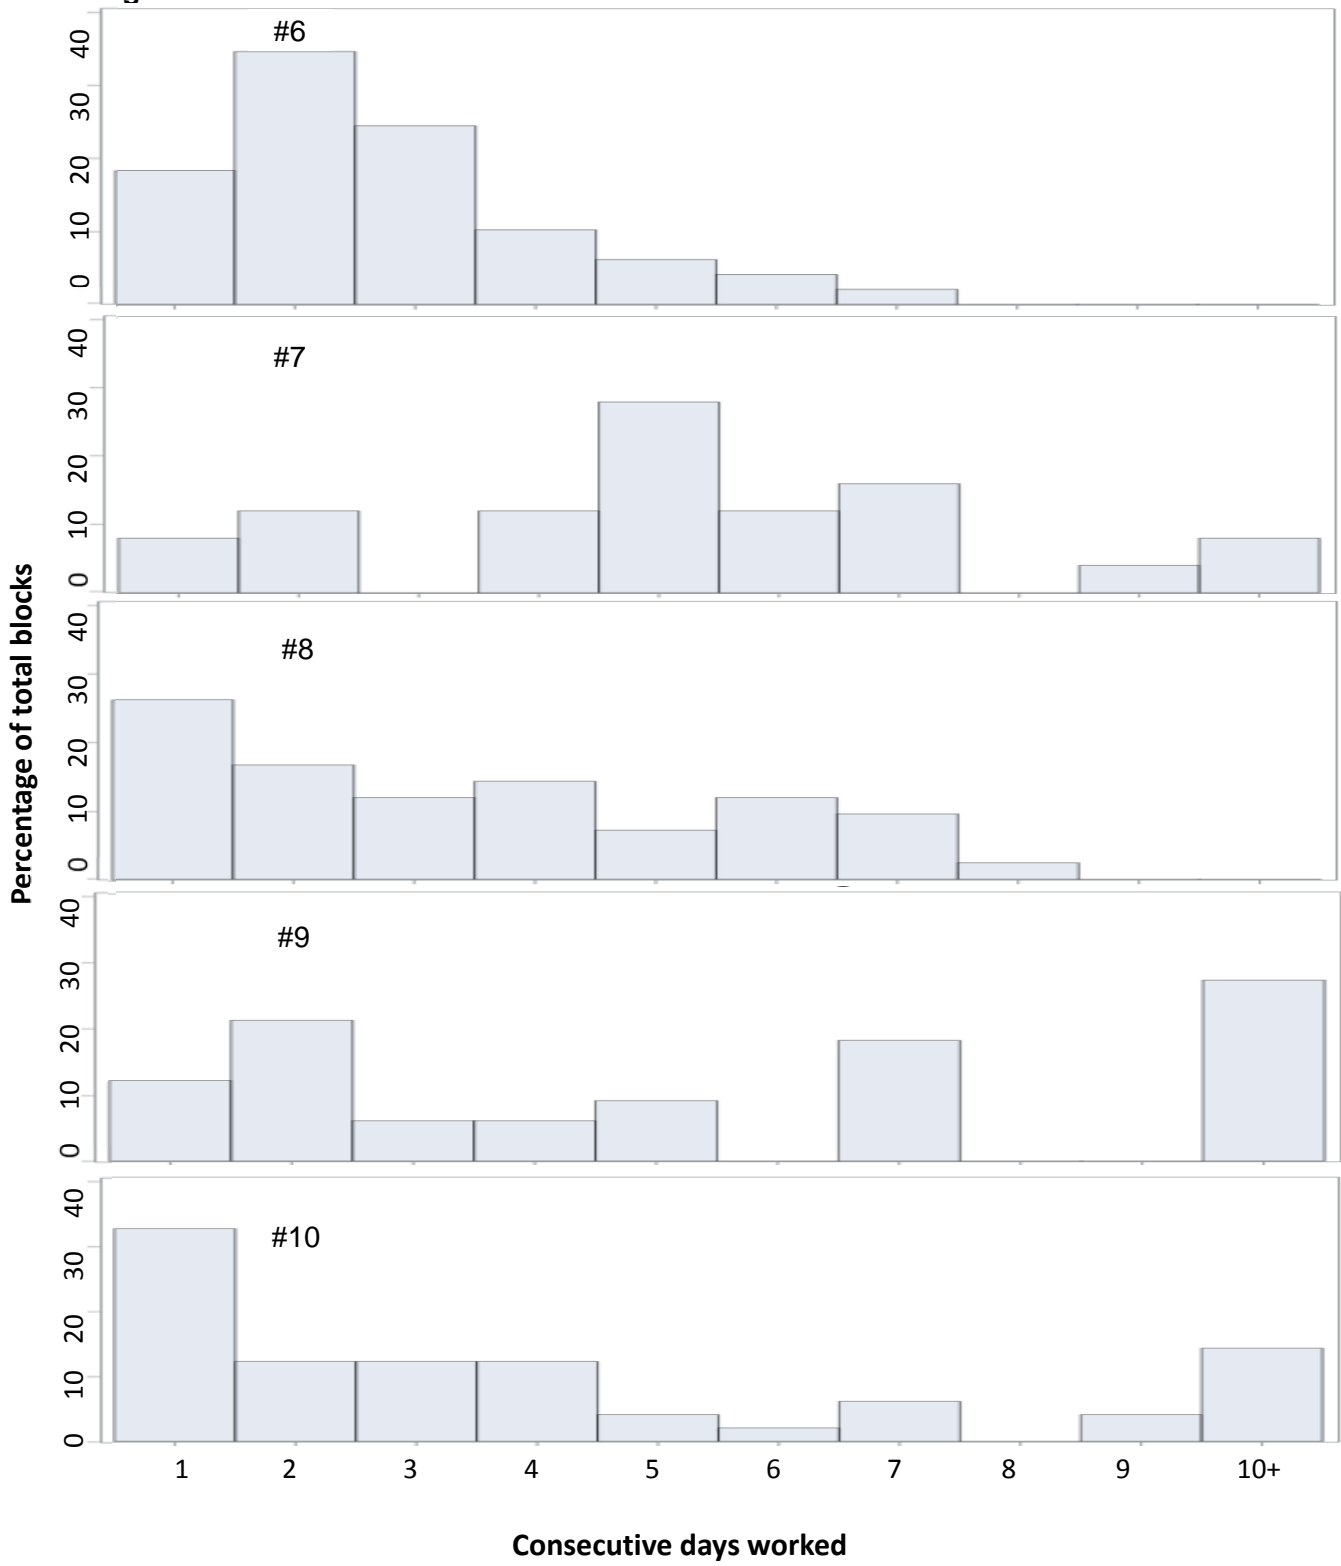

**eFigure 4.** Distribution of consecutive days worked for all hospitalists in 2016. All the working days for all hospitalists were grouped by whether they were part of a single working day or a block of 2, 3, 4, 5, 6, 7, 8, 9 or 10 or more consecutive working days. Shown in the figure is the percentage distribution of the blocks, and also the percentage distribution of total working days in those blocks.

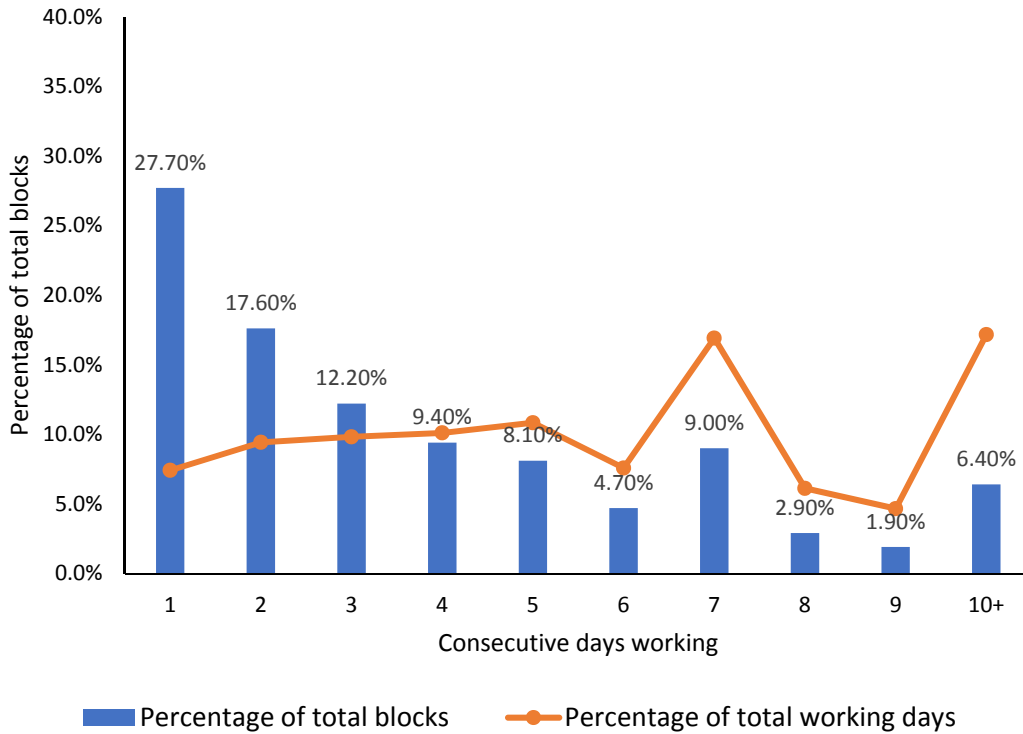

**eFigure 5.** Distribution of skewness in hospitalist schedules.<sup>1</sup> Skewness is a statistical measure to define the extent to which a distribution differs from a normal distribution. A zero value means a symmetric distribution, a negative value indicates that the tail is on the left side of the distribution, and a positive value indicates that the tail is on the right side of the distribution. We checked the distribution of working days in a row for each hospitalist. We found that only 19.9% of hospitalist schedules were normally distributed ( $-0.5 \leq \text{skewness} \leq 0.5$ ), 26.6% were moderately skewed ( $0.5 < \text{skewness} \leq 1$  or  $-1 \leq \text{skewness} < -0.5$ ), and 53.5% of hospitalist schedules were highly skewed ( $\text{skewness} < -1$  or  $\text{skewness} > 1$ ).<sup>1</sup>

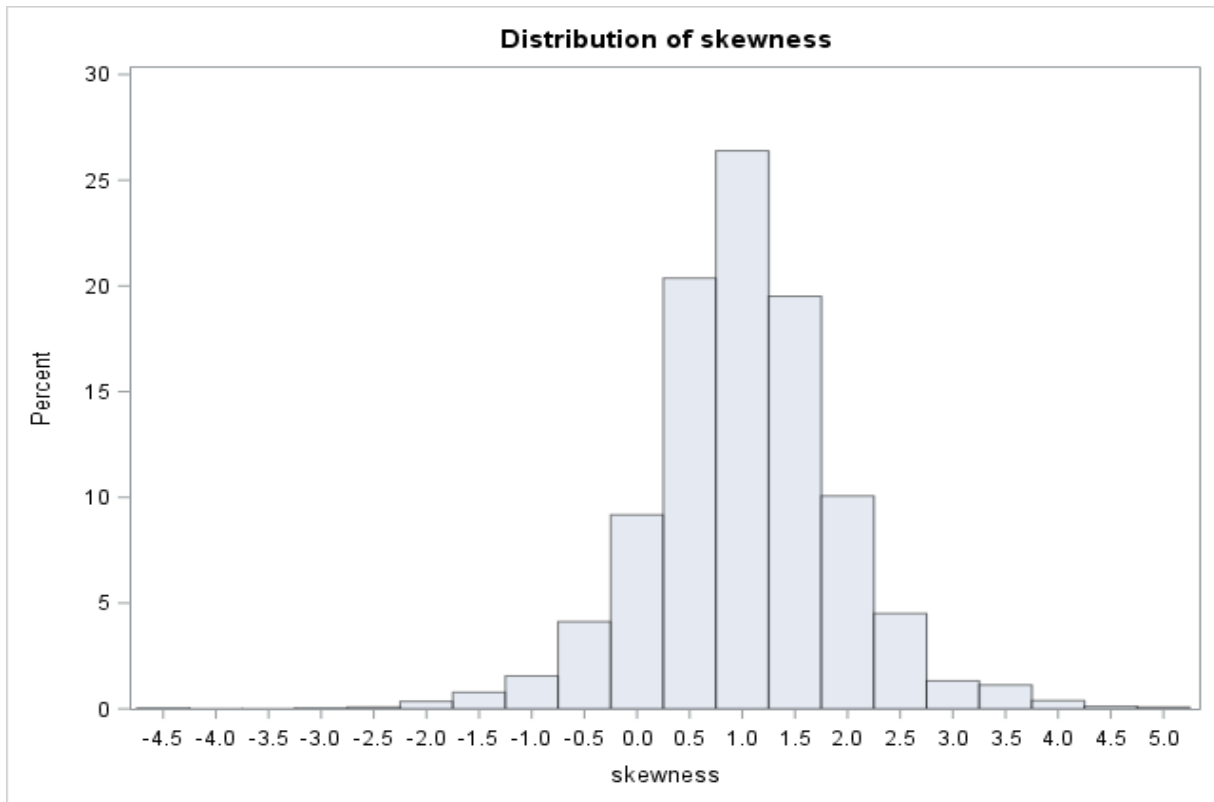



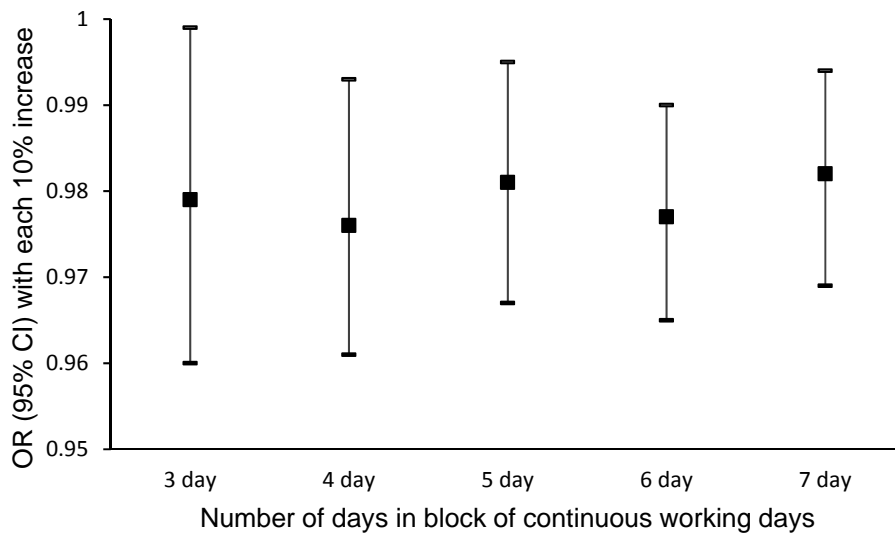

**eFigure 6.** The effect of varying the method of estimating continuity of hospitalist schedule on the association between hospitalist schedule and 30-day mortality. In the main analyses continuity of hospitalist schedule was estimated as the percent of all working days in a year of a given hospitalist that were part of a block of 7 or more consecutive working days, as described in Appendix Figure 2.

As shown in Appendix Figure 3, using a block of 3, 4, 5, or 6 continuous working days produces similar results. The odds (+/- 95% CIs) of 30-day mortality are expressed as a continuous function, each 10% increase in the ranking of weighted mean hospitalist schedule for an admission.

**Abbreviations:** OR, odds ratio; CI, confidence interval.

**eFigure 7.** Penalized B-splines smoothing curve and 95% confidence band for weighted average of median working days and 30 day mortality.<sup>2,3</sup> We measured the knots from 10 to 2000, and degree of freedom is stable to 1. The measure suggests a linear pattern in the dependence of 30 day mortality on the weighted average of median working days between 1 and 14 working days.

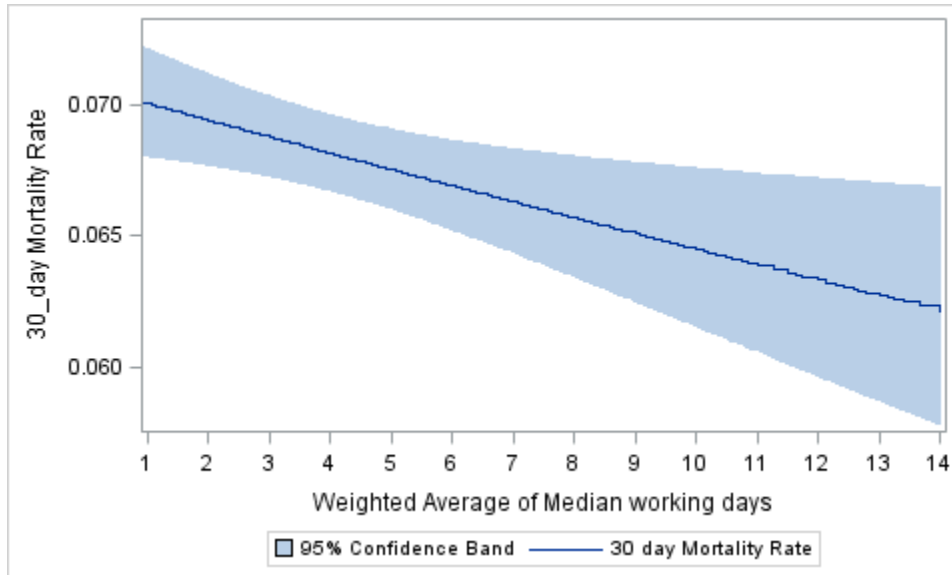

**eTable 1.** Odds of 30-day mortality for medical admissions aged 66+ and without an Intensive Care Unit (ICU) stay during hospitalization, by patient characteristics, from a conditional logistic model for 01/01/2014 - 11/30/2016, 100% TX Medicare data. <sup>a</sup>

| Characteristic                                                                              | N (%)                           | Observed rate | Odds Ratio* (95% Confidence Interval) |
|---------------------------------------------------------------------------------------------|---------------------------------|---------------|---------------------------------------|
| All                                                                                         | 114,777                         | 6.8%          |                                       |
|                                                                                             | Mean ± STD,<br>Median (Q1-Q3)   |               |                                       |
| Age (Per year)                                                                              | 79.9 ± 8.3<br>80.0 (73.0-86.0)  |               | 1.06 (1.06-1.07)                      |
| Education (Percent of persons age 25+ in ZIP code with high school education) (Per percent) | 82.6 ± 11.5<br>84.8 (76.7-91.7) |               | 1.00 (0.99-1.01)                      |
| <b>Weighted average of hospitalist schedules (7 day block)</b>                              |                                 |               |                                       |
| Q1                                                                                          | 29,068 (25.3%)                  | 7.2%          | Reference                             |
| Q2                                                                                          | 28,697 (25.0%)                  | 6.9%          | 0.92 (0.85-0.98)                      |
| Q3                                                                                          | 28,721 (25.0%)                  | 6.6%          | 0.90 (0.83-0.98)                      |
| Q4                                                                                          | 28,291 (24.7%)                  | 6.5%          | 0.88 (0.81-0.95)                      |
| <b>Year</b>                                                                                 |                                 |               |                                       |
| 2014                                                                                        | 39,137 (34.1%)                  | 6.9%          | Reference                             |
| 2015                                                                                        | 39,412 (34.3%)                  | 6.8%          | 0.98 (0.93-1.04)                      |
| 2016                                                                                        | 36,228 (31.6%)                  | 6.7%          | 0.99 (0.93-1.05)                      |
| <b>Gender</b>                                                                               |                                 |               |                                       |
| Male                                                                                        | 44,730 (39.0%)                  | 7.7%          | Reference                             |
| Female                                                                                      | 70,047 (61.0%)                  | 6.2%          | 0.75 (0.71-0.79)                      |
| <b>Medicaid</b>                                                                             |                                 |               |                                       |
| No                                                                                          | 90,447 (78.8%)                  | 6.8%          | Reference                             |
| Yes                                                                                         | 24,330 (21.1%)                  | 6.6%          | 1.03 (0.96-1.10)                      |
| <b>Race</b>                                                                                 |                                 |               |                                       |
| White                                                                                       | 85,497 (74.5%)                  | 7.1%          | Reference                             |
| Black                                                                                       | 10,236 (8.9%)                   | 5.9%          | 0.86 (0.78-0.95)                      |
| Hispanic                                                                                    | 16,757 (14.6%)                  | 6.2%          | 0.96 (0.88-1.05)                      |
| Other                                                                                       | 2,287 (2.0%)                    | 5.5%          | 0.86 (0.71-1.03)                      |
| <b>Residence prior to hospitalization</b>                                                   |                                 |               |                                       |
| Community                                                                                   | 108,511 (94.5%)                 | 6.7%          | Reference                             |
| Nursing facility or other institutions                                                      | 6,266 (5.5%)                    | 9.0%          | 1.48 (1.33-1.64)                      |
| <b>Length of stay</b>                                                                       |                                 |               |                                       |
| 3 days                                                                                      | 48,555 (42.3%)                  | 5.4%          | Reference                             |
| 4 days                                                                                      | 32,176 (28.0%)                  | 6.8%          | 1.21 (1.14-1.29)                      |
| 5 days                                                                                      | 20,578 (17.9%)                  | 8.2%          | 1.44 (1.35-1.54)                      |
| 6 days                                                                                      | 13,468 (11.7%)                  | 9.7%          | 1.81 (1.68-1.94)                      |
| <b>Number of hospitalizations in 12 months before admission (Per hospitalization)</b>       |                                 |               |                                       |
| 0                                                                                           | 57,100 (49.8%)                  | 5.5%          | Reference                             |
| 1                                                                                           | 29,000 (25.3%)                  | 7.4%          | 1.17 (1.10-1.26)                      |
| 2                                                                                           | 21,198 (18.5%)                  | 8.4%          | 1.22 (1.12-1.33)                      |
| 3 and above                                                                                 | 7,479 (6.5%)                    | 9.4%          | 1.42 (1.26-1.60)                      |
| <b>Emergency hospitalization</b>                                                            |                                 |               |                                       |
| No                                                                                          | 21,326 (18.6%)                  | 6.6%          | Reference                             |

|                                                                                    |                |       |                  |
|------------------------------------------------------------------------------------|----------------|-------|------------------|
| Yes                                                                                | 93,451 (81.4%) | 6.9%  | 1.19 (1.10-1.29) |
| Weekend hospitalization                                                            |                |       |                  |
| No                                                                                 | 79,503 (69.3%) | 6.8%  | Reference        |
| Yes                                                                                | 35,274 (30.7%) | 6.9%  | 0.99 (0.94-1.04) |
| <b>Admission diagnosis<sup>b</sup></b>                                             |                |       |                  |
| 102 Nonspecific Chest Pain                                                         | 3,709 (3.2%)   | 3.9%  | Reference        |
| 106 Cardiac dysrhythmias                                                           | 2,294 (2.0%)   | 5.5%  | 1.34 (1.04-1.72) |
| 108 Congestive heart failure; nonhypertensive                                      | 4,134 (3.6%)   | 8.0%  | 1.58 (1.28-1.96) |
| 109 Acute cerebrovascular disease                                                  | 2,296 (2.0%)   | 9.8%  | 1.86 (1.47-2.35) |
| 122 Pneumonia (except that caused by tuberculosis or sexually transmitted disease) | 6,760 (5.9%)   | 7.3%  | 1.39 (1.14-1.70) |
| 127 Chronic obstructive pulmonary disease and bronchiectasis                       | 2,971 (2.6%)   | 4.0%  | 1.23 (0.96-1.58) |
| 131 Respiratory failure                                                            | 1,028 (0.9%)   | 12.1% | 1.71 (1.27-2.28) |
| 133 Other lower respiratory disease                                                | 17,057 (14.9%) | 7.2%  | 1.68 (1.40-2.02) |
| 145 Intestinal obstruction without hernia                                          | 1,535 (1.3%)   | 5.2%  | 1.32 (1.01-1.75) |
| 153 Gastrointestinal hemorrhage                                                    | 3,967 (3.5%)   | 5.1%  | 1.21 (0.97-1.51) |
| 155 Other gastrointestinal disorders                                               | 2,433 (2.1%)   | 6.9%  | 1.42 (1.12-1.80) |
| 157 Acute and unspecified renal failure                                            | 2,991 (2.6%)   | 9.2%  | 1.69 (1.36-2.11) |
| 159 Urinary tract infections                                                       | 5,432 (4.7%)   | 5.4%  | 1.13 (0.92-1.40) |
| 163 Genitourinary symptoms                                                         | 1,223 (1.1%)   | 5.5%  | 1.33 (0.99-1.78) |
| 197 Skin and subcutaneous tissue infections                                        | 3,539 (3.1%)   | 2.4%  | 1.00 (0.78-1.27) |
| 2 Septicemia                                                                       | 3,891 (3.4%)   | 9.2%  | 1.70 (1.38-2.10) |
| 204 Arthropathy following intestinal bypass, unspecified site                      | 1,831 (1.6%)   | 4.4%  | 1.28 (0.98-1.68) |
| 205 Spondylosis; intervertebral disc disorders; other back problems                | 1,785 (1.6%)   | 5.8%  | 1.41 (1.08-1.84) |
| 211 Sleep related leg cramps                                                       | 3,482 (3.0%)   | 4.5%  | 1.22 (0.97-1.55) |
| 231 Fatigue fracture of vertebra, site unsp, init for fx                           | 1,542 (1.3%)   | 5.2%  | 1.34 (1.01-1.77) |
| 245 Syncope and collapse                                                           | 2,927 (2.6%)   | 4.0%  | 1.15 (0.90-1.46) |
| 246 Fever presenting with conditions classified elsewhere                          | 3,613 (3.2%)   | 4.4%  | 1.12 (0.89-1.40) |

|                                    |                 |       |                  |
|------------------------------------|-----------------|-------|------------------|
| 250 Nausea and vomiting            | 2,940 (2.6%)    | 6.4%  | 1.42 (1.13-1.79) |
| 251 Abdominal pain                 | 6,875 (6.0%)    | 5.0%  | 1.27 (1.03-1.56) |
| 252 Malaise and fatigue            | 7,175 (6.3%)    | 8.2%  | 1.77 (1.46-2.15) |
| 259 Insomnia, unspecified          | 9,666 (8.4%)    | 11.4% | 2.78 (2.31-3.34) |
| 55 Fluid and electrolyte disorders | 3,041 (2.7%)    | 9.1%  | 1.70 (1.37-2.12) |
| 59 Deficiency and other anemia     | 1,310 (1.1%)    | 7.7%  | 1.49 (1.13-1.98) |
| 93 Meniere's disease               | 1,276 (1.1%)    | 2.7%  | 1.28 (0.93-1.76) |
| 95 Other nervous system disorder   | 2,054 (1.8%)    | 7.1%  | 1.50 (1.17-1.93) |
| <b>Comorbidity</b>                 |                 |       |                  |
| Alcohol abuse                      |                 |       |                  |
| No                                 | 113,901 (99.2%) | 6.8%  | Reference        |
| Yes                                | 876 (0.8%)      | 8.9%  | 1.22 (0.94-1.58) |
| Cardiac Arrhythmia                 |                 |       |                  |
| No                                 | 69,506 (60.6%)  | 6.2%  | Reference        |
| Yes                                | 45,271 (39.4%)  | 7.7%  | 0.95 (0.90-1.01) |
| Blood Loss Anemia                  |                 |       |                  |
| No                                 | 111,276 (97.0%) | 6.8%  | Reference        |
| Yes                                | 3,501 (3.0%)    | 7.7%  | 0.85 (0.74-0.97) |
| Congestive Heart Failure           |                 |       |                  |
| No                                 | 75,074 (65.4%)  | 6.2%  | Reference        |
| Yes                                | 39,703 (34.6%)  | 8.0%  | 1.09 (1.03-1.16) |
| Chronic Pulmonary Disease          |                 |       |                  |
| No                                 | 74,660 (65.1%)  | 6.7%  | Reference        |
| Yes                                | 40,117 (34.9%)  | 7.0%  | 0.97 (0.91-1.02) |
| Coagulopathy                       |                 |       |                  |
| No                                 | 106,303 (92.6%) | 6.6%  | Reference        |
| Yes                                | 8,474 (7.4%)    | 9.8%  | 1.14 (1.05-1.24) |
| Deficiency Anemia                  |                 |       |                  |
| No                                 | 96,408 (84.0%)  | 6.6%  | Reference        |
| Yes                                | 18,369 (16.0%)  | 7.8%  | 1.09 (1.02-1.17) |
| Depression                         |                 |       |                  |
| No                                 | 87,360 (76.1%)  | 6.6%  | Reference        |
| Yes                                | 27,417 (23.9%)  | 7.4%  | 1.03 (0.97-1.09) |
| Diabetes Complicated               |                 |       |                  |
| No                                 | 89,722 (78.2%)  | 7.0%  | Reference        |
| Yes                                | 25,055 (21.8%)  | 6.0%  | 0.94 (0.87-1.01) |
| Diabetes Uncomplicated             |                 |       |                  |
| No                                 | 70,839 (61.7%)  | 7.1%  | Reference        |
| Yes                                | 43,938 (38.3%)  | 6.3%  | 0.99 (0.93-1.05) |
| Drug Abuse                         |                 |       |                  |
| No                                 | 114,323 (99.6%) | 6.8%  | Reference        |
| Yes                                | 454 (0.4%)      | 6.8%  | 1.09 (0.73-1.62) |
| Fluid and Electrolyte Disorders    |                 |       |                  |
| No                                 | 74,548 (65.0%)  | 5.8%  | Reference        |
| Yes                                | 40,229 (35.0%)  | 8.7%  | 1.19 (1.12-1.27) |
| AIDS/HIV                           |                 |       |                  |
| No                                 | 114,675 (99.9%) | 6.8%  | Reference        |
| Yes                                | 102 (0.1%)      | 2.9%  | 0.97 (0.37-2.55) |
| Hypertension complicated           |                 |       |                  |
| No                                 | 82,270 (71.7%)  | 6.6%  | Reference        |

|                                         |                 |       |                  |
|-----------------------------------------|-----------------|-------|------------------|
| Yes                                     | 32,507 (28.3%)  | 7.2%  | 0.81 (0.75-0.87) |
| Hypertension Uncomplicated              |                 |       |                  |
| No                                      | 21,406 (18.7%)  | 6.9%  | Reference        |
| Yes                                     | 93,371 (81.4%)  | 6.8%  | 0.81 (0.76-0.87) |
| Hypothyroidism                          |                 |       |                  |
| No                                      | 81,744 (71.2%)  | 6.8%  | Reference        |
| Yes                                     | 33,033 (28.8%)  | 6.9%  | 0.92 (0.88-0.98) |
| Liver Disease                           |                 |       |                  |
| No                                      | 109,258 (95.2%) | 6.7%  | Reference        |
| Yes                                     | 5,519 (4.8%)    | 8.2%  | 1.21 (1.08-1.34) |
| Lymphoma                                |                 |       |                  |
| No                                      | 112,584 (98.1%) | 6.7%  | Reference        |
| Yes                                     | 2,193 (1.9%)    | 10.5% | 1.44 (1.24-1.66) |
| Metastatic Cancer                       |                 |       |                  |
| No                                      | 110,707 (96.4%) | 6.3%  | Reference        |
| Yes                                     | 4,070 (3.6%)    | 20.6% | 4.22 (3.81-4.68) |
| Obesity                                 |                 |       |                  |
| No                                      | 100,619 (87.7%) | 7.1%  | Reference        |
| Yes                                     | 14,158 (12.3%)  | 4.7%  | 0.79 (0.73-0.87) |
| Other Neurological Disorders            |                 |       |                  |
| No                                      | 96,120 (83.8%)  | 6.4%  | Reference        |
| Yes                                     | 18,657 (16.2%)  | 8.9%  | 1.12 (1.05-1.20) |
| Pulmonary Circulation Disorders         |                 |       |                  |
| No                                      | 106,444 (92.7%) | 6.7%  | Reference        |
| Yes                                     | 8,333 (7.3%)    | 8.4%  | 1.13 (1.03-1.24) |
| Peptic Ulcer Disease excluding bleeding |                 |       |                  |
| No                                      | 112,773 (98.2%) | 6.8%  | Reference        |
| Yes                                     | 2,004 (1.8%)    | 7.1%  | 0.89 (0.74-1.06) |
| Peripheral Vascular Disorders           |                 |       |                  |
| No                                      | 85,514 (74.5%)  | 6.3%  | Reference        |
| Yes                                     | 29,263 (25.5%)  | 8.2%  | 1.14 (1.08-1.21) |
| Paralysis                               |                 |       |                  |
| No                                      | 111,517 (97.2%) | 6.8%  | Reference        |
| Yes                                     | 3,260 (2.8%)    | 8.5%  | 1.17 (1.03-1.34) |
| Psychoses                               |                 |       |                  |
| No                                      | 109,698 (95.6%) | 6.7%  | Reference        |
| Yes                                     | 5,079 (4.4%)    | 8.9%  | 1.11 (1.01-1.24) |
| Renal Failure                           |                 |       |                  |
| No                                      | 80,916 (70.5%)  | 6.4%  | Reference        |
| Yes                                     | 33,861 (29.5%)  | 7.7%  | 1.14 (1.06-1.23) |
| Weight Loss                             |                 |       |                  |
| No                                      | 101,128 (88.1%) | 6.1%  | Reference        |
| Yes                                     | 13,649 (11.9%)  | 11.7% | 1.49 (1.40-1.59) |
| Valvular Disease                        |                 |       |                  |
| No                                      | 98,143 (85.5%)  | 6.7%  | Reference        |
| Yes                                     | 16,634 (14.5%)  | 7.4%  | 0.91 (0.85-0.98) |
| Solid Tumor without Metastasis          |                 |       |                  |
| No                                      | 100,299 (87.4%) | 6.1%  | Reference        |
| Yes                                     | 14,478 (12.6%)  | 11.4% | 1.24 (1.15-1.34) |
| Rheumatoid Arthritis/collagen           |                 |       |                  |
| No                                      | 106,161 (92.5%) | 6.9%  | Reference        |
| Yes                                     | 8,616 (7.5%)    | 5.2%  | 0.81 (0.73-0.90) |

- a. Admissions were limited to those with a medical diagnosis-related group diagnosis who received all their generalist care (evaluation and management [E&M] charges from general internal medicine, family medicine or geriatric physicians) from hospitalists (defined as generalist physicians with >80% of E&M charges generated on care of hospitalized patients). Admissions with <3 or >6-day length of stay were excluded, as were admissions with >1 E&M charge from a hospitalist in a day.
- b. Admission diagnoses were categorized by the Clinical Classification Software (CCS) <sup>22, 23</sup>

**eTable 2.** Intraclass correlation coefficients (ICCs) from multilevel model predicting whether an admission received care from hospitalists who were in the highest quartile in mean weighted schedule continuity. All the admission characteristics included in Appendix Table 1, with the exception of quartile of hospitalist schedule, were included in the model that included admission characteristics.

|                                      | ICC for an admission being in highest quartile of hospitalist continuity <sup>a</sup> |
|--------------------------------------|---------------------------------------------------------------------------------------|
| Null Model                           | 0.4191                                                                                |
| Model plus admission characteristics | 0.4189                                                                                |
|                                      |                                                                                       |

- a. The ICCs are presented to four decimal places to illustrate the negligible impact of admission characteristics on the variation in mean weighted schedule continuity among admissions.



**eTable 3.** Association of each 10% increase in weighted mean hospital schedule continuity with 30-day mortality, readmission, and rate of discharge home.

| Outcome            | OR or HR (and 95% CI) with each 10% increase in schedule continuity |
|--------------------|---------------------------------------------------------------------|
| 30-day mortality   | 0.981 (0.968, 0.994)                                                |
| 30-day readmission | 0.990 (0.983, 0.998)                                                |
| Discharge home     | 1.002 (1.001, 1.003)                                                |

**Abbreviations:** OR, odds ratio; HR, hazard ratio; CI, confidence interval.

**eTable 4.** Association of continuity of hospitalist schedule, by quartile, with unadjusted and adjusted 30-day mortality, readmission and rate of discharge home. The first E&M charge from each admission was excluded in the determination of which hospitalists provided care during the admission. This was done because the first E&M charge might be from an on-call hospitalist or nocturnist if the patient were admitted in off-hours.

|                           | Q1<br>27,806 | Q2<br>28,064     | Q3<br>27,820     | Q4<br>27,470     |
|---------------------------|--------------|------------------|------------------|------------------|
| <b>30-day Mortality</b>   |              |                  |                  |                  |
| Unadjusted Rate           | 7.20%        | 6.89%            | 6.67%            | 6.41%            |
| OR (95% CI)               | Reference    | 0.92 (0.85-0.99) | 0.92 (0.85-0.99) | 0.87 (0.80-0.95) |
| <b>30-day Readmission</b> |              |                  |                  |                  |
| Unadjusted Rate           | 16.61%       | 16.51%           | 16.93%           | 16.45%           |
| HR (95% CI)               | Reference    | 0.97 (0.93-1.01) | 0.99 (0.94-1.04) | 0.95 (0.90-1.01) |
| <b>Discharge Home</b>     |              |                  |                  |                  |
| Unadjusted Rate           | 44.32%       | 43.16%           | 44.07%           | 46.87%           |
| OR (95% CI)               | Reference    | 1.01 (0.97-1.06) | 1.02 (0.97-1.06) | 1.08 (1.03-1.14) |

**eTable 5.** Correlation among 3098 hospitalists in their ranking of continuity of their schedules, with continuity of their schedules calculated as the percent of working days that were part of a 3, 4, 5, 6 or 7 day block of continuous working days. The ranking is expressed as quartiles (Table 5A) or as 1 through 3098 (Table 5B).

A. Ranking continuity of hospitalist schedule by quartile.

|        | 3 days | 4 days | 5 days | 6 days | 7 days |
|--------|--------|--------|--------|--------|--------|
| 3 days | 1      | 0.94   | 0.89   | 0.85   | 0.83   |
| 4 days |        | 1      | 0.95   | 0.90   | 0.89   |
| 5 days |        |        | 1      | 0.94   | 0.92   |
| 6 days |        |        |        | 1      | 0.97   |
| 7 days |        |        |        |        | 1      |

B. Ranking continuity of hospitalist schedules by 1 through 3098.

|        | 3 days | 4 days | 5 days | 6 days | 7 days |
|--------|--------|--------|--------|--------|--------|
| 3 days | 1      | 0.91   | 0.82   | 0.74   | 0.69   |
| 4 days |        | 1      | 0.93   | 0.85   | 0.80   |
| 5 days |        |        | 1      | 0.92   | 0.88   |
| 6 days |        |        |        | 1      | 0.95   |
| 7 days |        |        |        |        | 1      |

**eTable 6.** Association of continuity of the schedules of the treating hospitalists, by quartile, with unadjusted and adjusted 30-day mortality, 30-day readmission and rate of discharge home. The schedule continuity for each hospitalist was measured as the median number of consecutive days worked in a year. For each admission, the mean of the median days for each of the treating hospitalists was calculated, weighted by the number of E&M charges by each hospitalist submitted for the admission. The results are similar to those obtained when we assessed continuity of hospitalist schedules as the percent of total working days that were part of a 7-day or longer block of consecutive working days (Table 2). OR, odds ratio; CI, confidence interval; HR, hazards ratio.

|                           | Q1<br>n=29,088 (25.34%) | Q2<br>n=29,365 (25.58%) | Q3<br>n=30,978 (26.99%) | Q4<br>n=25,346 (22.08%) |
|---------------------------|-------------------------|-------------------------|-------------------------|-------------------------|
| <b>30-day Mortality</b>   |                         |                         |                         |                         |
| Unadjusted Rate           | 7.13%                   | 6.92%                   | 6.62%                   | 6.49%                   |
| OR (95% CI)               | Reference               | 0.96 (0.89-1.03)        | 0.92 (0.85-0.99)        | 0.88 (0.81-0.96)        |
| <b>30-day Readmission</b> |                         |                         |                         |                         |
| Unadjusted Rate           | 16.87%                  | 16.41%                  | 16.60%                  | 16.39%                  |
| HR (95% CI)               | Reference               | 0.96 (0.92-1.01)        | 0.95 (0.91-0.99)        | 0.93 (0.89-0.98)        |
| <b>Discharge Home</b>     |                         |                         |                         |                         |
| Unadjusted Rate           | 44.58%                  | 43.80%                  | 44.49%                  | 45.61%                  |
| OR (95% CI)               | Reference               | 1.07 (1.03-1.11)        | 1.05 (1.01-1.10)        | 1.06 (1.01-1.11)        |

## eReferences

1. Bulmer MG. *Principles of Statistics*. New York, NY: Courier Corp; 1979.
2. Bowman AW, Azzalini A. *Applied Smoothing Techniques for Data Analysis*. New York, NY: Oxford University Press; 1997.
3. Xiang D, Wahba G. A generalized approximate cross validation for smoothing splines with non-Gaussian data. *Stat Sin*. 1996;6(3):675-692.
